# Supplementary material
Source: Springer Nature journal article supplement (https://www.springermedizin.de/resource/supplementary/13005_2008_128_MOESM7_ESM.pdf/9626318)

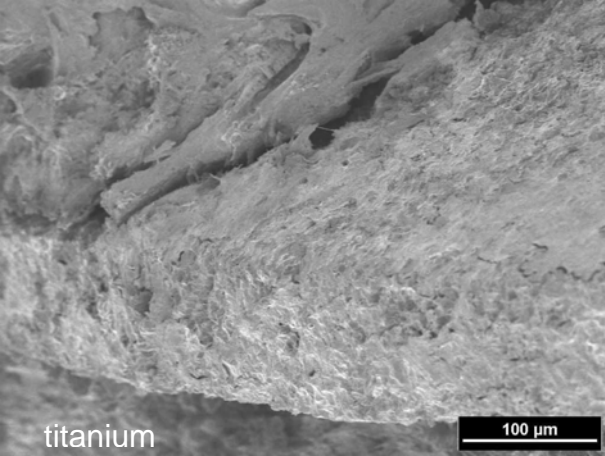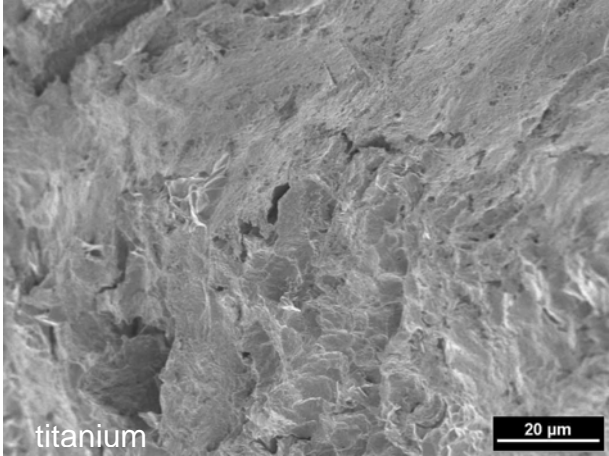

Supplement: MOESM7 [file 9626318]
